**CORRECTION**

## Rab4b controls an early endosome sorting event by interacting with the $\gamma$ -subunit of the clathrin adaptor complex 1

**Laura Perrin, Sandra Lacas-Gervais, Jérôme Gilleron, Franck Ceppo, François Prodon, Alexandre Benmerah, Jean-François Tanti and Mireille Cormont**

There was an error published in *J. Cell Sci.* **126**, 4950–4962.

All author names were transposed and indexed under first names. The correct author list is as shown above.

We apologise to the authors and readers for any confusion that this error might have caused.
